# Supplementary material for: Joint use of two-step fermentation and in-situ addition of chitosan oligosaccharide improving bacterial cellulose pellicle in the synthesis and various behaviors
Source: Research Square preprint supplement (doi:10.21203/rs.3.rs-2848414/v1), 2023-04-27
Supplement: Supplementary file 1 [file e7940789cc4dc63993be46a8.docx]

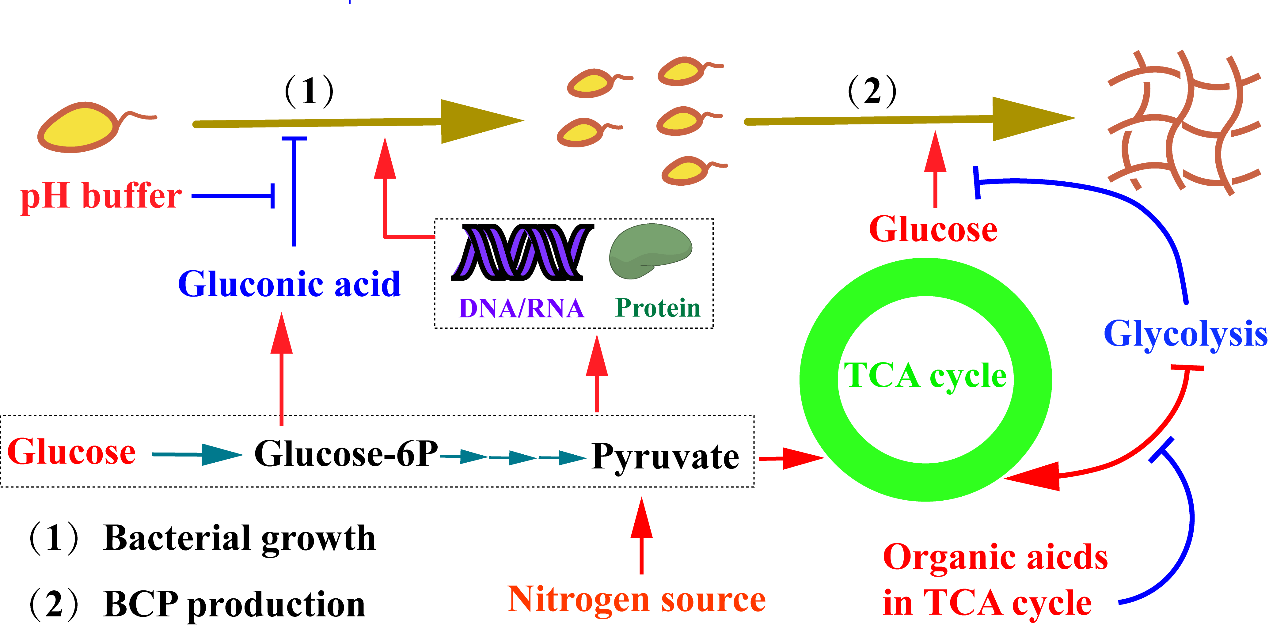


Scheme 1 Effects of diverse components of the optimized medium on BCP production


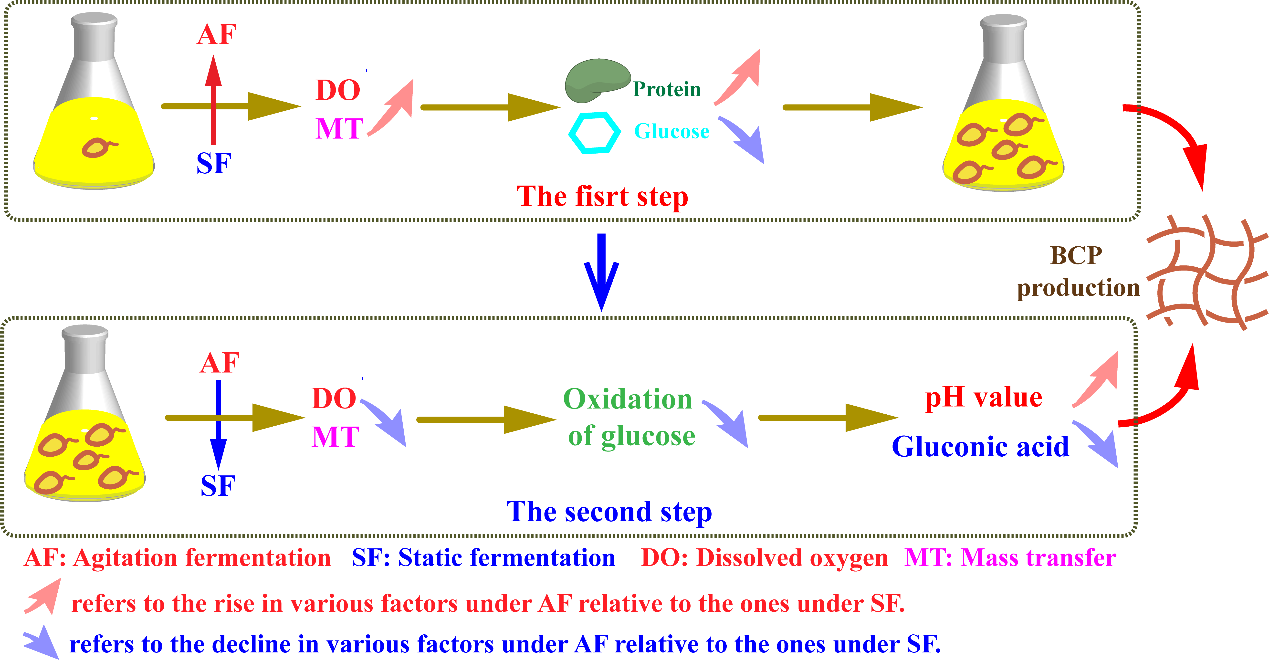


Scheme 2 Sketch for two-step fermentation to promote BCP production





Scheme 3 The mechanism for COS to enhance the yield and various behaviors of BCP
